# Supplementary material for: Valorization of Olive Leaf Polyphenols by Green Extraction and Selective Adsorption on Biochar Derived from Grapevine Pruning Residues
Source: MDPI journal article supplement (doi:10.3390/antiox13010001), 2023-12-19
Supplement: s1 [file s1]

Supplementary table S1. Olive leaves polyphenolic compounds content ( $\mu\text{g/g}$  DW) using MAC, UAE and MAE at different extraction conditions.

| Compound       | Condition           |                       | Method            |                  |                    | Method x<br>temperature x ratio<br>(p – value) |
|----------------|---------------------|-----------------------|-------------------|------------------|--------------------|------------------------------------------------|
|                | Temperature<br>(°C) | Solid/liquid<br>ratio | MAC               | UAE              | MAE                |                                                |
| Hydroxytyrosol | 30                  | 1:25                  | 103 $\pm$ 0 kl    | 113 $\pm$ 1 gi   | 7.1 $\pm$ 0.5 i    | ***                                            |
|                |                     | 1:50                  | 117 $\pm$ 4 g-i   | 78.3 $\pm$ 5.8 i | 108 $\pm$ 5 ab     |                                                |
|                |                     | 1:100                 | 93.4 $\pm$ 2.9 lm | 82.2 $\pm$ 0.4 i | 109 $\pm$ 7 ab     |                                                |
|                |                     | 1:250                 | 79.6 $\pm$ 1.7 n  | 85 $\pm$ 1.5 i   | 66.8 $\pm$ 14.7 gh |                                                |
|                |                     | 1:500                 | 90.2 $\pm$ 1.2 m  | 87.3 $\pm$ 1.2 i | 51.1 $\pm$ 5 h     |                                                |
|                | 45                  | 1:25                  | 113 $\pm$ 1 ij    | 123 $\pm$ 1 fg   | 96.1 $\pm$ 0.1 a-e |                                                |
|                |                     | 1:50                  | 117 $\pm$ 1 g-i   | 124 $\pm$ 2 ef   | 109 $\pm$ 0 ab     |                                                |
|                |                     | 1:100                 | 105 $\pm$ 2 jk    | 107 $\pm$ 1 h    | 94.2 $\pm$ 0.4 a-e |                                                |
|                |                     | 1:250                 | 90.1 $\pm$ 0.4 m  | 87.9 $\pm$ 0.6 i | 89.1 $\pm$ 2.5 b-g |                                                |
|                |                     | 1:500                 | 93.2 $\pm$ 5.2 lm | 107 $\pm$ 3 h    | 101 $\pm$ 4 a-d    |                                                |
|                | 60                  | 1:25                  | 127 $\pm$ 0 fg    | 134 $\pm$ 0 de   | 102 $\pm$ 3 a-d    |                                                |
|                |                     | 1:50                  | 129 $\pm$ 1 ef    | 137 $\pm$ 1 de   | 87.4 $\pm$ 0.2 b-g |                                                |
|                |                     | 1:100                 | 121 $\pm$ 3 f-i   | 125 $\pm$ 1 ef   | 74.3 $\pm$ 2.1 e-h |                                                |
|                |                     | 1:250                 | 103 $\pm$ 0 kl    | 109 $\pm$ 3 h    | 82.1 $\pm$ 1.5 c-g |                                                |
|                |                     | 1:500                 | 101 $\pm$ 1 kl    | 110 $\pm$ 2 h    | 91.7 $\pm$ 3.2 a-f |                                                |
|                | 75                  | 1:25                  | 143 $\pm$ 2 cd    | 185 $\pm$ 1 ab   | 114 $\pm$ 3 a      |                                                |
|                |                     | 1:50                  | 146 $\pm$ 1 b-d   | 186 $\pm$ 2 ab   | 104 $\pm$ 1 a-c    |                                                |
|                |                     | 1:100                 | 138 $\pm$ 1 de    | 161 $\pm$ 0 c    | 79.1 $\pm$ 2.6 d-g |                                                |
|                |                     | 1:250                 | 125 $\pm$ 1 f-h   | 154 $\pm$ 2 c    | 74.5 $\pm$ 1.4 e-g |                                                |
|                |                     | 1:500                 | 116 $\pm$ 2 hi    | 140 $\pm$ 2 de   | 82 $\pm$ 1.9 c-g   |                                                |
|                | 90                  | 1:25                  | 158 $\pm$ 1 a     | 188 $\pm$ 1 ab   | 108 $\pm$ 2 ab     |                                                |

|                        |    |       |                |                |                 |     |
|------------------------|----|-------|----------------|----------------|-----------------|-----|
| Luteolin-7-O-glucoside |    | 1:50  | 161 ± 1 a      | 193 ± 1 a      | 105 ± 2 a-c     |     |
|                        |    | 1:100 | 153 ± 1 a-c    | 185 ± 2 ab     | 86.7 ± 6 b-g    |     |
|                        |    | 1:250 | 155 ± 2 ab     | 182 ± 2 ab     | 69.3 ± 5 f-h    |     |
|                        |    | 1:500 | 159 ± 1 a      | 180 ± 2 b      | 79.1 ± 1 d-g    |     |
|                        | 30 | 1:25  | 14 ± 1.5 hi    | 15.6 ± 0.8 j-l | 4.98 ± 3.5 k    | *** |
|                        |    | 1:50  | 13.2 ± 1.9 hi  | 17.5 ± 1.1 i-l | 8.23 ± 0.43 jk  |     |
|                        |    | 1:100 | 26.6 ± 3.3 e-h | 37.9 ± 3.6 b-d | 17.7 ± 0.7 f-j  |     |
|                        |    | 1:250 | 24.7 ± 3.4 e-h | 22.4 ± 2.9 g-k | 18.3 ± 2.3 f-j  |     |
|                        |    | 1:500 | 16.2 ± 1.3 g-i | 13.9 ± 0.9 kl  | 23.2 ± 0.2 e-g  |     |
|                        | 45 | 1:25  | 15.3 ± 0.4 hi  | 15.2 ± 1.1 j-l | 21.8 ± 2.4 e-h  |     |
|                        |    | 1:50  | 14.6 ± 2.7 hi  | 18 ± 1 h-l     | 28.6 ± 1.7 d-f  |     |
|                        |    | 1:100 | 26.5 ± 4.2 e-h | 33.4 ± 2.1 d-f | 36.5 ± 3.1 b-d  |     |
|                        |    | 1:250 | 12.8 ± 0.6 hi  | 14.5 ± 0.6 kl  | 20.2 ± 2.9 e-i  |     |
|                        |    | 1:500 | 7.73 ± 0.78 i  | 16.1 ± 0.9 j-l | 9.1 ± 3.73 i-k  |     |
|                        | 60 | 1:25  | 22.9 ± 0.3 f-h | 30.8 ± 1.4 d-g | 41.9 ± 1.8 bc   |     |
|                        |    | 1:50  | 32.1 ± 0.8 ef  | 47.1 ± 2.9 ab  | 29.1 ± 0.9 d-f  |     |
|                        |    | 1:100 | 22.8 ± 2.3 f-i | 27.9 ± 0.6 d-h | 18.4 ± 0.9 f-j  |     |
|                        |    | 1:250 | 19.2 ± 0.2 f-i | 14.2 ± 0.3 kl  | 8.42 ± 1.34 i-k |     |
|                        |    | 1:500 | 22.8 ± 1 f-h   | 10.3 ± 0.6 l   | 9.73 ± 0.19 i-k |     |
|                        | 75 | 1:25  | 38.6 ± 1.8 de  | 27 ± 1.6 e-i   | 30.9 ± 0.7 c-e  |     |
|                        |    | 1:50  | 54.3 ± 0.9 c   | 29.1 ± 4.3 d-g | 42.2 ± 1.1 bc   |     |
|                        |    | 1:100 | 31.1 ± 1 e-g   | 35.8 ± 1.3 c-e | 29.3 ± 0.1 d-f  |     |
|                        |    | 1:250 | 20.6 ± 0.7 f-i | 24.8 ± 1.9 f-j | 15.6 ± 1.1 g-k  |     |
|                        |    | 1:500 | 12.7 ± 2.2 hi  | 10.7 ± 0.7 l   | 9.93 ± 0.62 h-k |     |
|                        | 90 | 1:25  | 78.9 ± 7.5 a   | 45.9 ± 1.7 a-c | 37.5 ± 6.3 b-d  |     |

|                      |    |       |                |                |                |     |
|----------------------|----|-------|----------------|----------------|----------------|-----|
| Apigenin-7-glucoside |    | 1:50  | 69.7 ± 1.2 ab  | 29.2 ± 0.5 d-g | 57.2 ± 2.2 a   | *** |
|                      |    | 1:100 | 74 ± 1.8 a     | 55.2 ± 1.8 a   | 48.2 ± 1.5 ab  |     |
|                      |    | 1:250 | 55.6 ± 6.1 bc  | 18.5 ± 1.2 h-l | 29 ± 1.4 d-f   |     |
|                      |    | 1:500 | 51.6 ± 4.1 cd  | 44.3 ± 3 bc    | 29.6 ± 0.3 d-f |     |
|                      | 30 | 1:25  | 25.7 ± 1.4 l   | 30.2 ± 1.9 l   | 3.29 ± 3.29 i  |     |
|                      |    | 1:50  | 27 ± 2.4 kl    | 30.6 ± 1.6 l   | 28.7 ± 4 gh    |     |
|                      |    | 1:100 | 46.4 ± 2.9 f-j | 51.7 ± 2.1 d-i | 37.2 ± 2.6 f-h |     |
|                      |    | 1:250 | 47.4 ± 3.4 e-j | 41.4 ± 1.6 jk  | 27.9 ± 2.4 h   |     |
|                      |    | 1:500 | 41.3 ± 1.7 h-j | 41.1 ± 0.8 jk  | 49.8 ± 1.2 a-f |     |
|                      | 45 | 1:25  | 38.5 ± 0.7 ij  | 29.2 ± 0.8 l   | 38.3 ± 1.9 e-h |     |
|                      |    | 1:50  | 41.3 ± 3.1 h-j | 35.1 ± 1.8 kl  | 48 ± 1.6 a-f   |     |
|                      |    | 1:100 | 54.3 ± 3 d-g   | 55.9 ± 1.5 c-f | 59.8 ± 2 a     |     |
|                      |    | 1:250 | 52.8 ± 0.8 e-g | 41.4 ± 0.8 jk  | 53.9 ± 3.3 a-d |     |
|                      |    | 1:500 | 45.5 ± 2.3 g-j | 46.7 ± 2.2 g-j | 49.5 ± 6.3 a-f |     |
|                      | 60 | 1:25  | 37.7 ± 0.4 jk  | 46.1 ± 0.3 h-j | 56.4 ± 0.9 a-c |     |
|                      |    | 1:50  | 49.5 ± 0.9 e-h | 61.5 ± 1.3 bc  | 51.2 ± 0.9 a-e |     |
|                      |    | 1:100 | 46 ± 1 f-j     | 59.9 ± 0.8 b-d | 48.5 ± 1.4 a-f |     |
|                      |    | 1:250 | 44.6 ± 1.1 g-j | 52.2 ± 0.4 d-i | 39.1 ± 2.7 e-h |     |
|                      |    | 1:500 | 50.5 ± 1.2 e-h | 47.7 ± 0.7 f-j | 41.9 ± 0.2 d-g |     |
|                      | 75 | 1:25  | 46.3 ± 1.1 f-j | 48.2 ± 1.1 e-j | 45.5 ± 0.4 b-f |     |
|                      |    | 1:50  | 69.5 ± 1.5 ab  | 50.2 ± 4.6 e-i | 58.7 ± 0.8 ab  |     |
|                      |    | 1:100 | 58.1 ± 0.2 c-e | 59.3 ± 0.6 b-d | 55.3 ± 0.4 a-c |     |
|                      |    | 1:250 | 56.3 ± 0.6 d-f | 55.1 ± 1.9 c-g | 44.5 ± 0.4 c-f |     |
|                      |    | 1:500 | 48.9 ± 3.2 e-i | 48.5 ± 1 e-j   | 40.8 ± 1 d-h   |     |
|                      | 90 | 1:25  | 69.8 ± 2.2 ab  | 54 ± 0.9 c-h   | 44.1 ± 5.4 c-f |     |

|            |    |       |                |               |                |     |
|------------|----|-------|----------------|---------------|----------------|-----|
| Oleuropein |    | 1:50  | 77.9 ± 0.2 a   | 45.1 ± 0.4 ij | 59.1 ± 1 a     | *** |
|            |    | 1:100 | 73.8 ± 0.3 ab  | 70.3 ± 1.2 a  | 58.9 ± 1.3 a   |     |
|            |    | 1:250 | 67.5 ± 3.5 a-c | 56.8 ± 2 b-e  | 49.1 ± 1 a-f   |     |
|            |    | 1:500 | 64.7 ± 2.1 b-d | 64.8 ± 1.1 ab | 53.5 ± 1.1 a-d |     |
|            | 30 | 1:25  | 517 ± 4 n      | 450 ± 26 l    | 167 ± 11 j     |     |
|            |    | 1:50  | 658 ± 49 lm    | 655 ± 6 k     | 197 ± 6 j      |     |
|            |    | 1:100 | 848 ± 13 jk    | 807 ± 6 ij    | 507 ± 59 f-i   |     |
|            |    | 1:250 | 857 ± 51 jk    | 839 ± 39 i    | 682 ± 47 c-h   |     |
|            |    | 1:500 | 980 ± 49 ij    | 711 ± 30 jk   | 1218 ± 122 a   |     |
|            | 45 | 1:25  | 599 ± 4 mn     | 471 ± 6 l     | 726 ± 1 b-g    |     |
|            |    | 1:50  | 761 ± 9 kl     | 641 ± 9 k     | 795 ± 5 b-f    |     |
|            |    | 1:100 | 788 ± 23 kl    | 719 ± 15 jk   | 809 ± 13 b-e   |     |
|            |    | 1:250 | 951 ± 16 ij    | 809 ± 8 ij    | 940 ± 26 a-c   |     |
|            |    | 1:500 | 1174 ± 21 gh   | 1032 ± 54 h   | 774 ± 40 b-f   |     |
|            | 60 | 1:25  | 727 ± 15 k-m   | 1065 ± 9 gh   | 618 ± 31 d-i   |     |
|            |    | 1:50  | 930 ± 4 ij     | 1267 ± 16 f   | 539 ± 16 e-i   |     |
|            |    | 1:100 | 1050 ± 28 hi   | 1401 ± 3 e    | 446 ± 4 g-j    |     |
|            |    | 1:250 | 1252 ± 5 g     | 1648 ± 21 c   | 382 ± 52 ij    |     |
|            |    | 1:500 | 1499 ± 47 ef   | 1960 ± 20 a   | 752 ± 15 b-f   |     |
|            | 75 | 1:25  | 1186 ± 6 g     | 869 ± 3 i     | 822 ± 24 b-e   |     |
|            |    | 1:50  | 1456 ± 12 f    | 1145 ± 17 g   | 954 ± 17 a-c   |     |
|            |    | 1:100 | 1628 ± 13 de   | 1283 ± 2 f    | 920 ± 35 bc    |     |
|            |    | 1:250 | 1986 ± 34 c    | 1541 ± 21 cd  | 870 ± 40 b-d   |     |
|            |    | 1:500 | 2213 ± 12 b    | 1895 ± 28 ab  | 877 ± 86 b-d   |     |

|                       |    |       |               |               |               |     |
|-----------------------|----|-------|---------------|---------------|---------------|-----|
| Sum of<br>polyphenols | 90 | 1:25  | 1269 ± 7 g    | 882 ± 7 i     | 983 ± 27 ab   | *** |
|                       |    | 1:50  | 1580 ± 5 ef   | 1089 ± 2 gh   | 1002 ± 22 ab  |     |
|                       |    | 1:100 | 1758 ± 6 d    | 1286 ± 7 f    | 915 ± 79 bc   |     |
|                       |    | 1:250 | 2123 ± 18 b   | 1534 ± 10 d   | 749 ± 125 b-f |     |
|                       |    | 1:500 | 2397 ± 17 a   | 1824 ± 23 b   | 412 ± 90 h-j  |     |
|                       | 30 | 1:25  | 852 ± 4 o     | 785 ± 25 m    | 212 ± 17 l    |     |
|                       |    | 1:50  | 1081 ± 42 n   | 971 ± 6 l     | 496 ± 26 kl   |     |
|                       |    | 1:100 | 1353 ± 4 j-l  | 1279 ± 15 j   | 862 ± 61 h-j  |     |
|                       |    | 1:250 | 1327 ± 59 j-l | 1288 ± 39 j   | 953 ± 50 f-j  |     |
|                       |    | 1:500 | 1450 ± 58 i-k | 1110 ± 27 k   | 1582 ± 122 a  |     |
|                       | 45 | 1:25  | 1019 ± 6 n    | 824 ± 3 m     | 1076 ± 7 d-i  |     |
|                       |    | 1:50  | 1230 ± 9 lm   | 1045 ± 12 kl  | 1208 ± 7 b-g  |     |
|                       |    | 1:100 | 1314 ± 37 kl  | 1227 ± 14 j   | 1268 ± 20 b-e |     |
|                       |    | 1:250 | 1461 ± 18 ij  | 1243 ± 4 j    | 1370 ± 34 a-d |     |
|                       |    | 1:500 | 1662 ± 29 gh  | 1539 ± 57 g-i | 1176 ± 45 b-g |     |
|                       | 60 | 1:25  | 1156 ± 16 mn  | 1568 ± 8 gh   | 1053 ± 38 e-i |     |
|                       |    | 1:50  | 1447 ± 10 i-k | 1860 ± 14 e   | 901 ± 17 g-j  |     |
|                       |    | 1:100 | 1587 ± 32 hi  | 1966 ± 1 de   | 765 ± 10 i-k  |     |
|                       |    | 1:250 | 1766 ± 6 g    | 2203 ± 39 b   | 700 ± 58 jk   |     |
|                       |    | 1:500 | 2037 ± 55 f   | 2476 ± 22 a   | 1108 ± 17 c-h |     |
|                       | 75 | 1:25  | 1707 ± 3 gh   | 1437 ± 8 i    | 1227 ± 30 b-f |     |
|                       |    | 1:50  | 2096 ± 11 ef  | 1711 ± 20 f   | 1396 ± 17 a-c |     |
|                       |    | 1:100 | 2221 ± 13 de  | 1850 ± 3 e    | 1311 ± 31 a-e |     |
|                       |    | 1:250 | 2544 ± 33 c   | 2076 ± 22 cd  | 1207 ± 35 b-g |     |

|    |       |             |             |                |
|----|-------|-------------|-------------|----------------|
|    | 1:500 | 2727 ± 11 b | 2383 ± 29 a | 1227 ± 93 b-f  |
| 90 | 1:25  | 1959 ± 8 f  | 1475 ± 6 hi | 1398 ± 56 a-c  |
|    | 1:50  | 2270 ± 2 de | 1605 ± 2 fg | 1460 ± 25 ab   |
|    | 1:100 | 2435 ± 10 c | 1900 ± 10 e | 1339 ± 88 a-e  |
|    | 1:250 | 2748 ± 9 b  | 2099 ± 9 bc | 1104 ± 142 c-h |
|    | 1:500 | 3037 ± 22 a | 2405 ± 22 a | 781 ± 84 i-k   |

---

MAC – maceration; UAE – ultrasound-assisted extraction; MAE – microwave-assisted extraction; TE – Trolox equivalents; \*– p-value ≤ 0.05; \*\* – p-value ≤ 0.01; \*\*\* – p-value ≤ 0.001. Small letters represent different homogenous groups using Tukey's post-hoc test.
